# Supplementary material for: Electron transfer vs. proton-coupled electron transfer as the mechanism of reaction between amino acids and triplet-excited benzophenones revealed by time-resolved CIDNP
Source: Royal Society of Chemistry journal article supplement (doi:10.1039/c8cp03591a), 2018-01-01
Supplement: c8cp03591a1.pdf [file c8cp03591a1.pdf]

**Electron transfer vs proton-coupled electron  
transfer as the mechanism of reaction between  
amino acids and triplet-excited benzophenones  
revealed by time-resolved CIDNP**

Olga B. Morozova,<sup>a,b</sup> Mikhail S. Panov,<sup>a,b</sup> Natalya N. Fishman<sup>a,b</sup>  
and Alexandra V. Yurkovskaya<sup>a,b\*</sup>

<sup>a</sup>International Tomography Center, Institutskaya 3a, 630090 Novosibirsk, Russia

<sup>b</sup>Novosibirsk State University, Pirogova 2, 630090 Novosibirsk, Russia

# Supporting Information

## Contents

|                                                                           |   |
|---------------------------------------------------------------------------|---|
| 1. Calculated $^1\text{H}$ HFCCs of TCBP radicals of different structure  | 3 |
| 2. Calculated $^1\text{H}$ HFCCs of DCBP radicals of different structure  | 4 |
| 3. Calculated $^1\text{H}$ HFCCs of 4-CBP radicals of different structure | 5 |
| 4. Calculated $^1\text{H}$ HFCCs of BP radicals of different structure    | 6 |
| 5. Determination of HFCCs of DCBP anion radical                           | 7 |

Table S1. Calculated  $^1\text{H}$  HFCCs of TCBP radicals of different structure.

| Radical      |                                                                                     |        |        |
|--------------|-------------------------------------------------------------------------------------|--------|--------|
| <b>T-I</b>   | 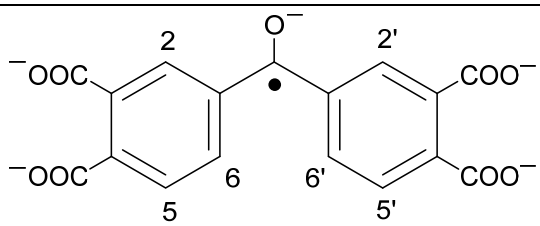   | H2     | -0.304 |
|              |                                                                                     | H2'    | -0.287 |
|              |                                                                                     | H6     | -0.272 |
|              |                                                                                     | H6'    | -0.300 |
|              |                                                                                     | H5     | 0.131  |
|              |                                                                                     | H5'    | 0.141  |
| <b>T-II</b>  |    | H2     | -0.455 |
|              |                                                                                     | H2'    | -0.383 |
|              |                                                                                     | H6     | -0.458 |
|              |                                                                                     | H6'    | -0.412 |
|              |                                                                                     | H5     | 0.227  |
|              |                                                                                     | H5'    | 0.217  |
| <b>T-III</b> |    | H2     | -0.134 |
|              |                                                                                     | H2'    | -0.178 |
|              |                                                                                     | H6     | -0.559 |
|              |                                                                                     | H6'    | -0.078 |
|              |                                                                                     | H5     | 0.130  |
|              |                                                                                     | H5'    | 0.056  |
| <b>T-IV</b>  |  | H2     | -0.219 |
|              |                                                                                     | H2'    | -0.094 |
|              |                                                                                     | H6     | -0.170 |
|              |                                                                                     | H6'    | -0.131 |
|              |                                                                                     | H5     | 0.071  |
|              |                                                                                     | H5'    | -0.183 |
|              | COOH                                                                                | -0.113 |        |

Table S2. Calculated  $^1\text{H}$  HFCCs of DCBP radicals of different structure

| Radical      |                                                                                    |             |                                                                                   |
|--------------|------------------------------------------------------------------------------------|-------------|-----------------------------------------------------------------------------------|
| <b>D-I</b>   | 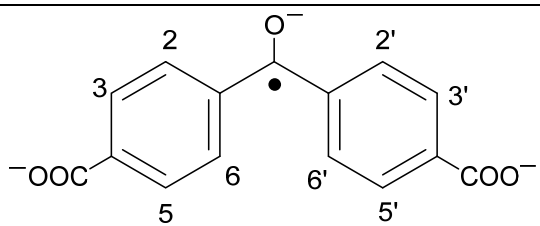  | H2          | -0.270                                                                            |
|              |                                                                                    | H2'         | -0.272                                                                            |
|              |                                                                                    | H6          | -0.201                                                                            |
|              |                                                                                    | H6'         | -0.199                                                                            |
|              |                                                                                    | H3          | 0.088                                                                             |
|              |                                                                                    | H3'         | 0.089                                                                             |
|              |                                                                                    | H5          | 0.037                                                                             |
|              |                                                                                    | H5'         | 0.039                                                                             |
|              |                                                                                    | <b>D-II</b> |  |
| H2'          | -0.497                                                                             |             |                                                                                   |
| H6           | -0.544                                                                             |             |                                                                                   |
| H6'          | -0.509                                                                             |             |                                                                                   |
| H3           | 0.299                                                                              |             |                                                                                   |
| H3'          | 0.285                                                                              |             |                                                                                   |
| H5           | 0.306                                                                              |             |                                                                                   |
| H5'          | 0.282                                                                              |             |                                                                                   |
| <b>D-III</b> |  | H2          | -0.245                                                                            |
|              |                                                                                    | H2'         | -0.220                                                                            |
|              |                                                                                    | H6          | -0.194                                                                            |
|              |                                                                                    | H6'         | -0.192                                                                            |
|              |                                                                                    | H3          | 0.002                                                                             |
|              |                                                                                    | H3'         | 0.105                                                                             |
|              |                                                                                    | H5          | -0.056                                                                            |
|              |                                                                                    | H5'         | 0.093                                                                             |
|              | COOH                                                                               | -0.051      |                                                                                   |

Table S3. Calculated  $^1\text{H}$  HFCCs of 4-CBP radicals of different structure

| Radical      |                                                                                     |             |                                                                                   |
|--------------|-------------------------------------------------------------------------------------|-------------|-----------------------------------------------------------------------------------|
| <b>4-I</b>   | 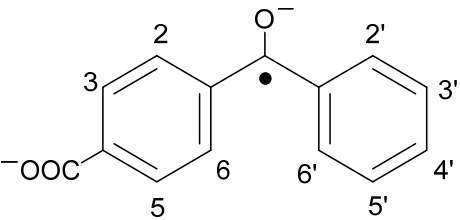   | H2          | -0.387                                                                            |
|              |                                                                                     | H2'         | -0.343                                                                            |
|              |                                                                                     | H6          | -0.342                                                                            |
|              |                                                                                     | H6'         | -0.308                                                                            |
|              |                                                                                     | H3          | 0.160                                                                             |
|              |                                                                                     | H3'         | 0.162                                                                             |
|              |                                                                                     | H4'         | -0.390                                                                            |
|              |                                                                                     | H5          | 0.146                                                                             |
|              |                                                                                     | H5'         | 0.157                                                                             |
|              |                                                                                     | <b>4-II</b> |  |
| H2'          | -0.379                                                                              |             |                                                                                   |
| H6           | -0.515                                                                              |             |                                                                                   |
| H6'          | -0.396                                                                              |             |                                                                                   |
| H3           | 0.237                                                                               |             |                                                                                   |
| H3'          | 0.169                                                                               |             |                                                                                   |
| H4'          | -0.411                                                                              |             |                                                                                   |
| H5           | 0.242                                                                               |             |                                                                                   |
| H5'          | 0.168                                                                               |             |                                                                                   |
| OH           | -0.290                                                                              |             |                                                                                   |
| <b>4-III</b> |  | H2          | -0.238                                                                            |
|              |                                                                                     | H2'         | -0.207                                                                            |
|              |                                                                                     | H6          | -0.161                                                                            |
|              |                                                                                     | H6'         | -0.170                                                                            |
|              |                                                                                     | H3          | -0.011                                                                            |
|              |                                                                                     | H3'         | 0.077                                                                             |
|              |                                                                                     | H4'         | -0.234                                                                            |
|              |                                                                                     | H5          | -0.073                                                                            |
|              |                                                                                     | H5'         | 0.066                                                                             |
|              |                                                                                     | COOH        | -0.050                                                                            |

Table S4. Calculated  $^1\text{H}$  HFCCs of BP radicals of different structure

| Radical   |                                                                                   |       |        |
|-----------|-----------------------------------------------------------------------------------|-------|--------|
| <b>I</b>  | 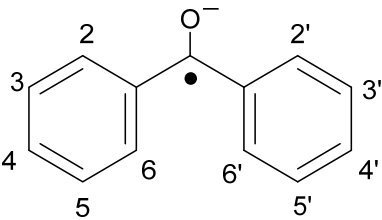 | H2,2' | -0.332 |
|           |                                                                                   | H6,6' | -0.315 |
|           |                                                                                   | H3,3' | 0.127  |
|           |                                                                                   | H4,4' | -0.419 |
|           |                                                                                   | H5,5' | 0.126  |
| <b>II</b> |  | H2    | -0.468 |
|           |                                                                                   | H2'   | -0.473 |
|           |                                                                                   | H6    | -0.460 |
|           |                                                                                   | H6'   | -0.479 |
|           |                                                                                   | H3    | 0.199  |
|           |                                                                                   | H3'   | 0.211  |
|           |                                                                                   | H4    | 0.496  |
|           |                                                                                   | H4'   | 0.522  |
|           |                                                                                   | H5    | 0.200  |
|           |                                                                                   | H5'   | 0.208  |
| OH        | -0.305                                                                            |       |        |

### Determination of HFCCs of DCBP anion radical

The photoreaction of DCBP with Trp which reacts with the excited triplets via electron transfer was used for experimental determination of the HFCCs of the DCBP radical anion. The tryptophanyl cation radical HFCCs, determined in our previous work [1], are given in Table S5 and were used as reference. The CIDNP spectrum obtained in photoreaction of DCBP and Trp is shown in Fig. S1. Enhanced absorption of protons H4 and H2, 6, and emission for protons H5 and  $\beta$  are in accordance with Kaptain's rules. Overlapping signals of H2, 6 and 5 were analysed together.

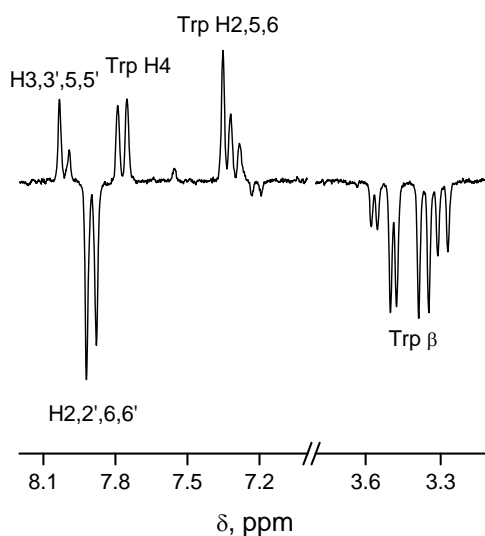

Figure S1. 200 MHz <sup>1</sup>H CIDNP spectra, obtained in the photoreaction of 0.5 mM 4,4'-dicarboxy benzophenone and 2 mM Trp in D<sub>2</sub>O at pH 7.4.

The distribution of CIDNP intensities of Trp demonstrated a linear dependence on HFCCs with protons of tryptophanyl cation radical Trp<sup>•+</sup> with determination coefficient  $R^2=1$  (Fig. S2). Using the proportionality relation, we calculated HFCCs for DCBP radical anion **D-I** (Table 1,e): -0.25 mT (H2,2',6,6') and 0.075 mT (H3,3',5,5')

Table S5. <sup>1</sup>H HFCCs of tryptophanyl cation radical Trp<sup>•+</sup> taken from Ref. 1.

| Proton   | HFCC, mT |
|----------|----------|
| H4       | -0.45    |
| H2,5,6   | -0.19    |
| $\alpha$ | -0.03    |
| $\beta$  | 1.00     |

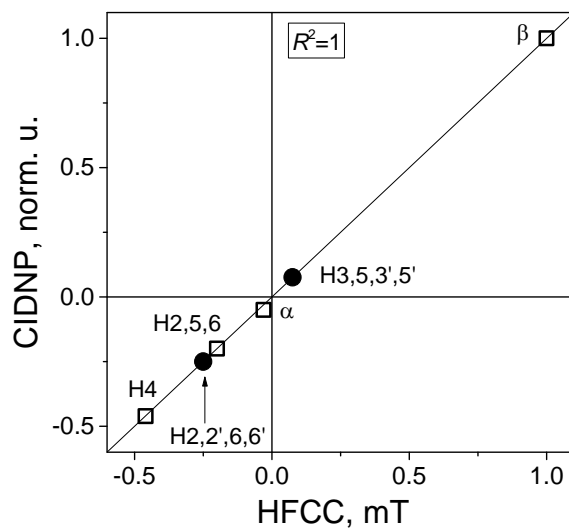

Figure S2. Correlation between the  $^1\text{H}$  CIDNP intensities detected in the photoreaction of 4,4'-dicarboxy benzophenone (DCBP) and L-tryptophan (Trp), and the  $^1\text{H}$  HFCCs of tryptophanyl cation radical  $\text{Trp}^{\bullet+}$  (squares) and with DCBP anion radical **D-I** (circles). Solid line: best fit by the function  $P_{2j} = -CA_{2j}$  (fitting to squares) with  $A_{2j}$  taken from Ref. 1 (Table S5);  $A_{1i}$  calculated from the dependence  $A_{1i} = C^{-1}P_{1i}$  (fitting to circles).

## References

- [1] O. B. Morozova, K. L. Ivanov, A. S. Kiryutin, R. Z. Sagdeev, T. Köchling, H.-M. Vieth and A. V. Yurkovskaya, *Phys. Chem. Chem. Phys.*, 2011, 13, 6619-6627
